# Supplementary material
Source: MDPI journal article supplement (https://www.mdpi.com/2073-4344/13/6/1016)
Supplement: s1 [file s1]

Supplementary Material

# GAS-PHASE DEOXYGENATION OF BIOMASS PYROLYSIS TAR CATALYZED BY RARE EARTH METAL LOADED H $\beta$ ZEOLITE

Ali A. Jazie <sup>1</sup>, Juma Haydary <sup>2,\*</sup>, Suhad A. Abed<sup>1</sup> and Jakub Husár<sup>2</sup>

<sup>1</sup> Department of Chemical Engineering, University of Al-Qadisiyah, Al-Qadisiyah, Iraq; ali.jazie@qu.edu.iq

<sup>2</sup> bInstitute of Chemical and Environmental Engineering, Faculty of Chemical and Food Technology, Slovak University of Technology, Radlinského 9, 812 37, Bratislava, Slovakia; juma.haydary@stuba.sk

\* Correspondence: Juma Haydary, E-mail address: juma.haydary@stuba.sk (J. Haydary)

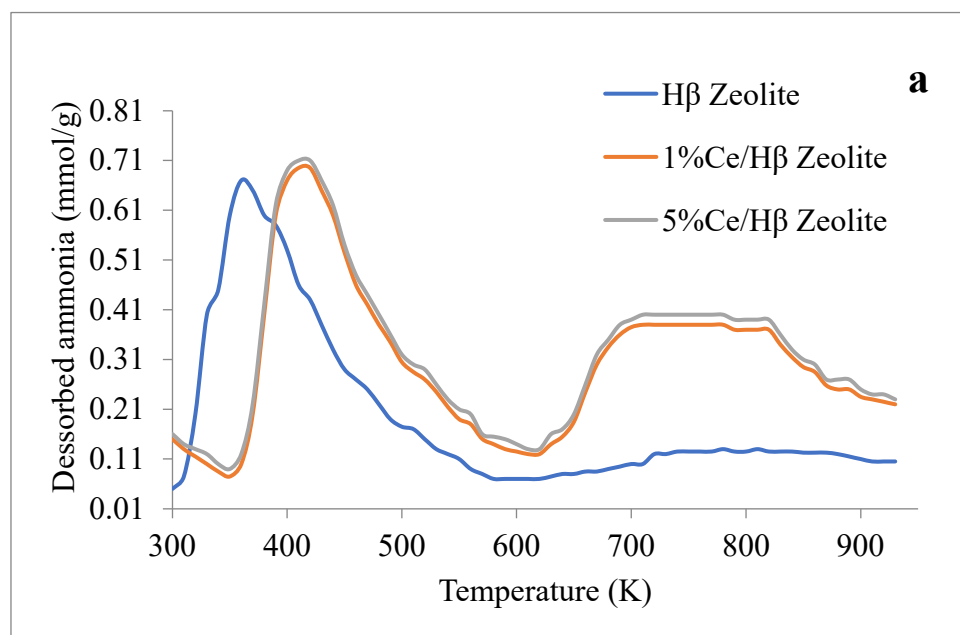

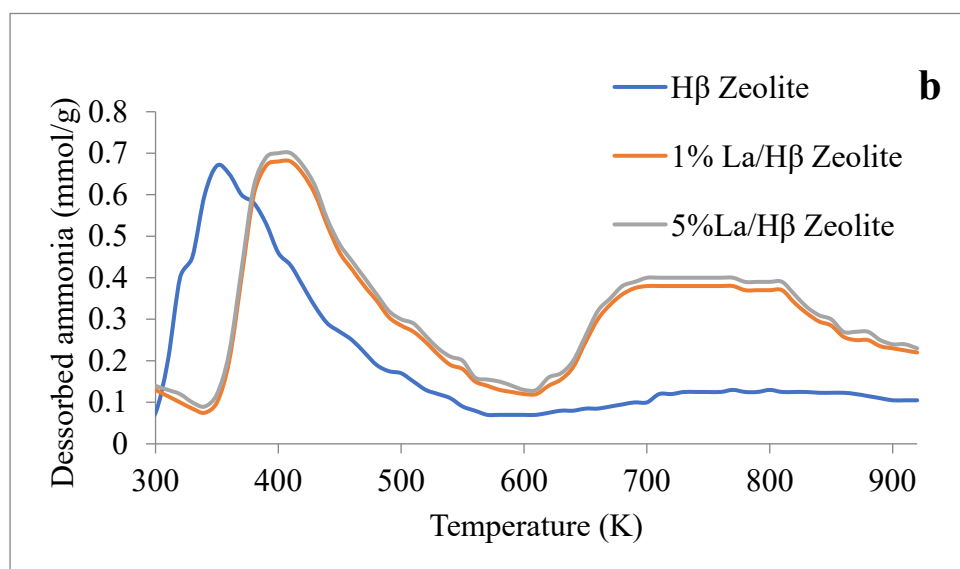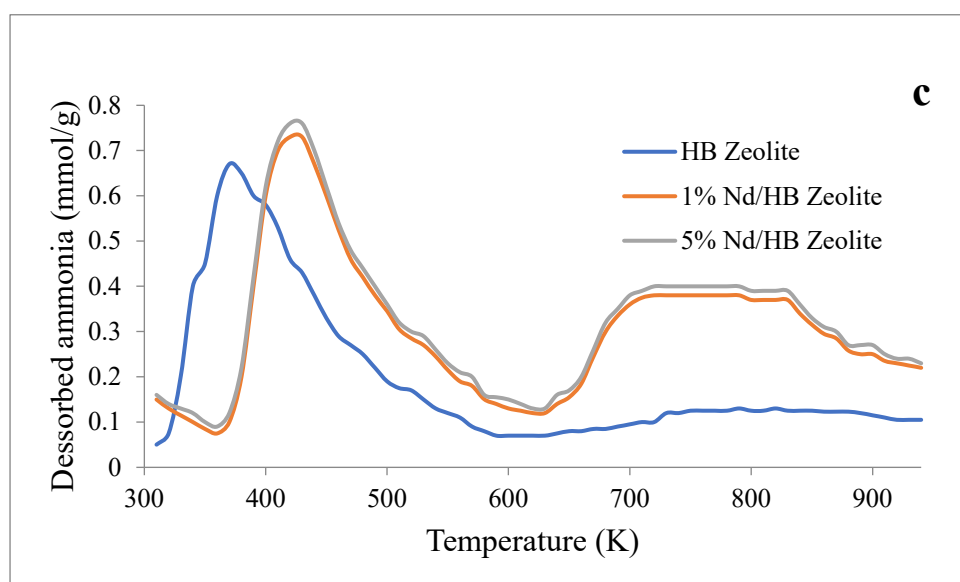

**Figure S1.** Ammonia-TPD profiles for for pure H $\beta$  zeolite, 1wt% loaded H $\beta$  zeolite, and 5wt% loaded H $\beta$  zeolite before and after their regeneration at 800°C for 2h (a) Ce loaded H $\beta$  zeolite, (b) La loaded H $\beta$  zeolite, and (c) Nd loaded H $\beta$  zeolite (All catalysts were calcined for 6h at 550°C).

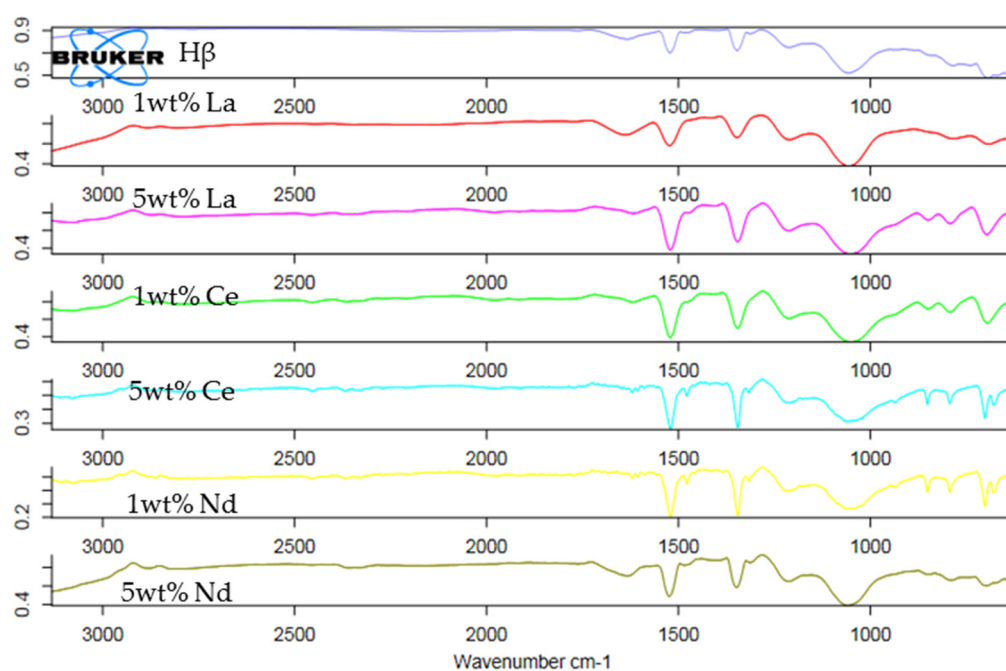

**Figure S2.** Pyridine-Fourier-Transform Infra-Red Spectroscopy for pure H $\beta$  zeolite, 1wt% Ce/ H $\beta$  zeolite, 5wt% Ce/ H $\beta$  zeolite, 1wt% La/ H $\beta$  zeolite, 5wt% La/ H $\beta$  zeolite, 1wt% Nd/ H $\beta$  zeolite, and 5wt% Nd/ H $\beta$  zeolite (All catalysts were calcined for 6h at 550°C).

**Table S1.** GC-FID analysis of liquid phase products of the GDO reaction of acetone.

| Retention time, min | Compound Class | Compound                | Formula                        |
|---------------------|----------------|-------------------------|--------------------------------|
| 1.53                | Aromatics      | Benzene                 | C <sub>6</sub> H <sub>6</sub>  |
| 1.696               |                | Toluene                 | C <sub>7</sub> H <sub>8</sub>  |
| 2.08                |                | O-xylene                | C <sub>8</sub> H <sub>10</sub> |
| 2.11                |                | P-xylene                | C <sub>8</sub> H <sub>10</sub> |
| 2.30                |                | Ethylbenzene            | C <sub>8</sub> H <sub>10</sub> |
| 2.46                |                | Mesitylene              | C <sub>9</sub> H <sub>12</sub> |
| 2.49                |                | 1-Ethyl-4-methylbenzene | C <sub>9</sub> H <sub>12</sub> |
| 2.51                |                | 1-Ethyl-3-methylbenzene | C <sub>9</sub> H <sub>12</sub> |
| 2.53                |                | 1-Ethyl-2-methylbenzene | C <sub>9</sub> H <sub>12</sub> |

|       |           |                                  |                                               |
|-------|-----------|----------------------------------|-----------------------------------------------|
| 2.71  |           | 2,3-Dihydro-methyl-1H-indene     | C <sub>10</sub> H <sub>12</sub>               |
| 2.83  |           | P-Cymene                         | C <sub>10</sub> H <sub>14</sub>               |
| 2.97  |           | 2,2-Dimethylindene, 2,3-dihydro- | C <sub>11</sub> H <sub>14</sub>               |
| 1.313 | Aldehydes | Acetaldehyde                     | C <sub>2</sub> H <sub>4</sub> O               |
| 1.466 | Ketones   | Acetone                          | C <sub>2</sub> H <sub>6</sub> O               |
| 2.19  |           | Methyl isobutyl ketone           | C <sub>4</sub> H <sub>8</sub> O               |
| 1.637 | Alcohols  | Methanol                         | CH <sub>3</sub> OH                            |
| 1.843 |           | Ethanol                          | C <sub>2</sub> H <sub>6</sub> O               |
| 1.76  |           | Isopropanol                      | C <sub>2</sub> H <sub>8</sub> O               |
| 1.52  | Alkanes   | Butane                           | C <sub>4</sub> H <sub>10</sub>                |
| 1.58  |           | N-Pentane                        | C <sub>5</sub> H <sub>12</sub>                |
| 1.62  | Alkenes   | 4-Methyl-1-pentene               | C <sub>6</sub> H <sub>12</sub>                |
| 2.12  | Esters    | 5-Hexenyl acetate                | C <sub>8</sub> H <sub>14</sub> O <sub>2</sub> |
| 1.193 | Furans    | 2-Methylfuran                    | C <sub>5</sub> H <sub>6</sub> O               |

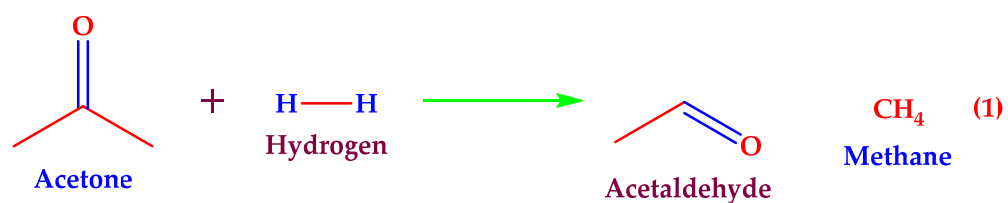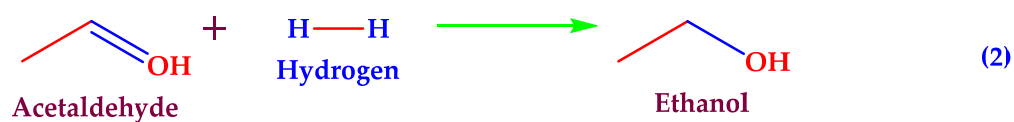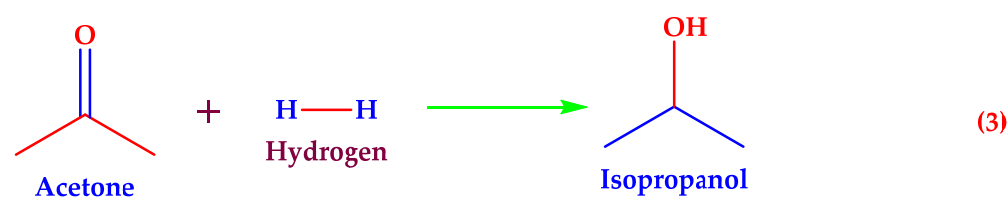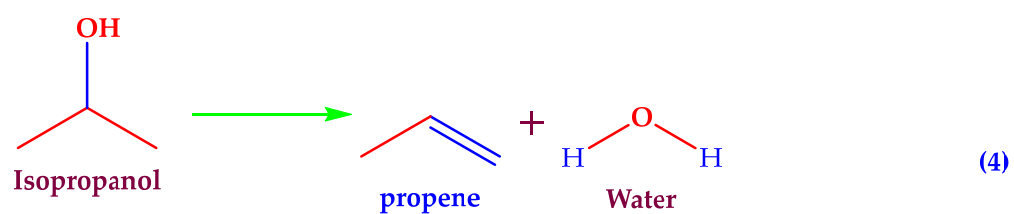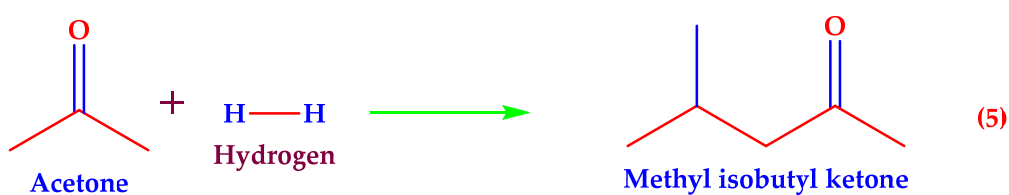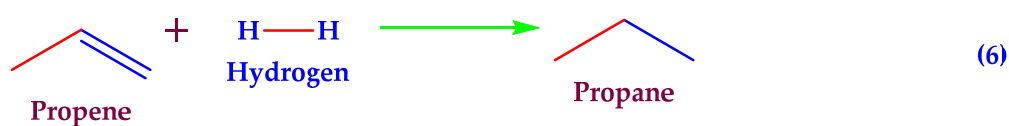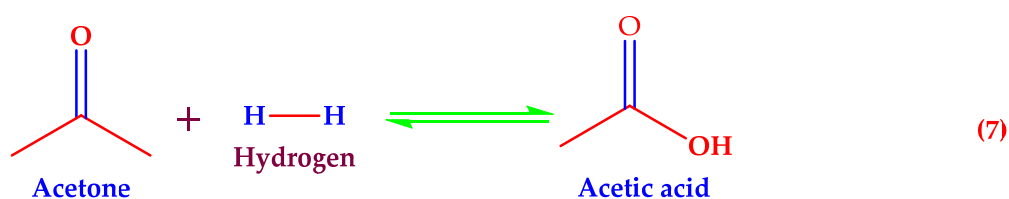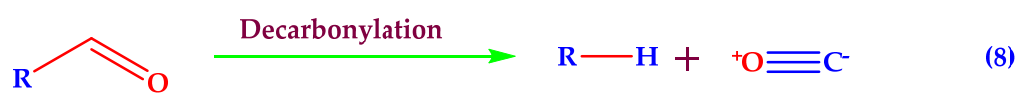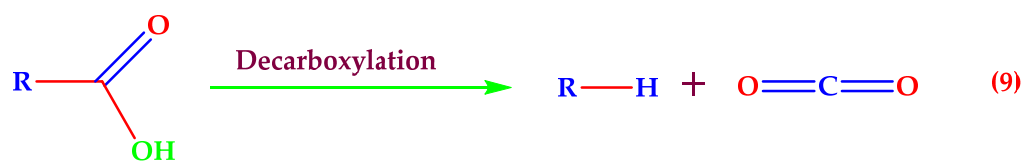

**Figure S3.** Reaction network for GDO of acetone model compound at 400°C using 1wt% Ce/ H $\beta$  zeolite as the catalyst. 38  
39

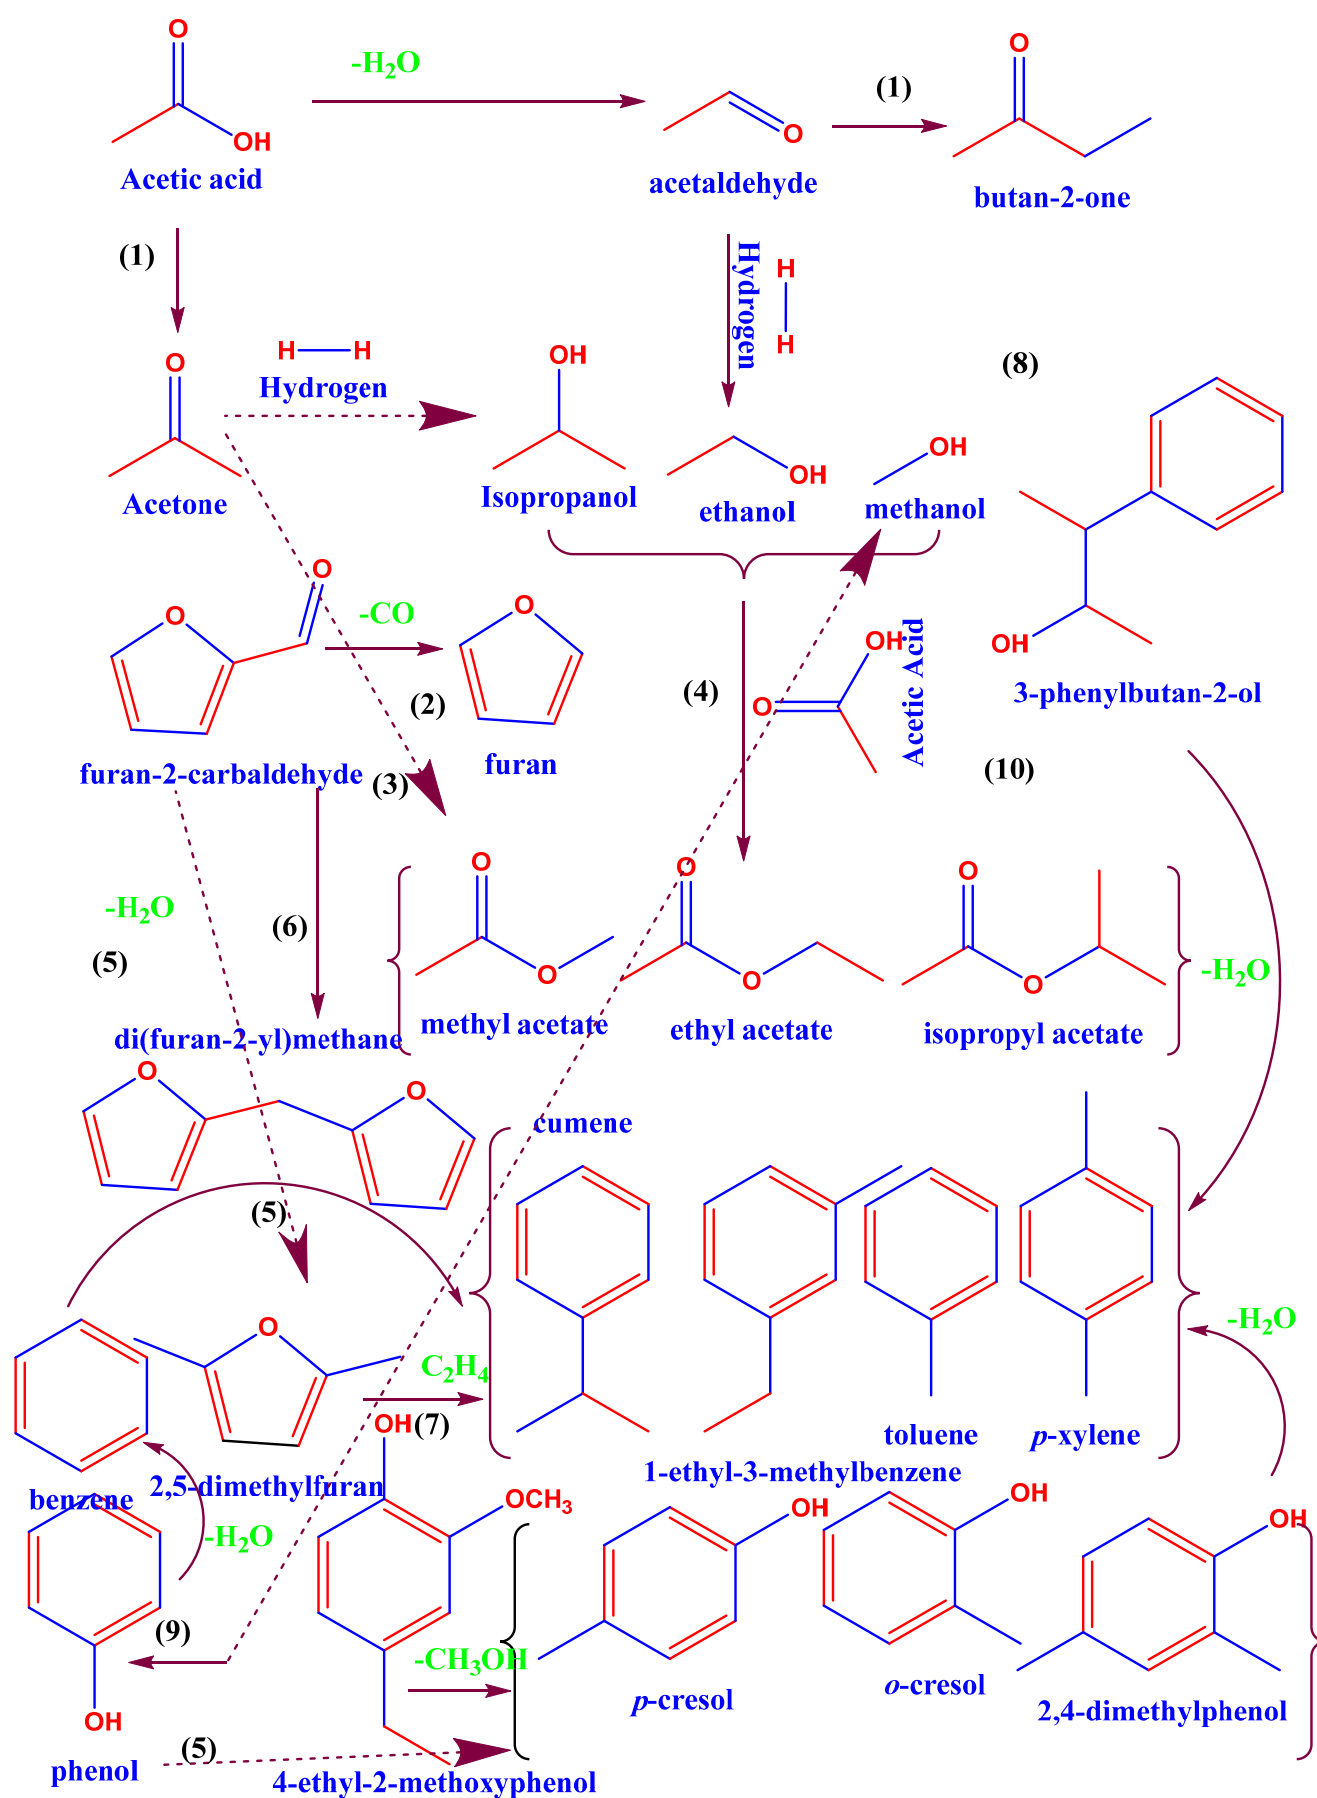

**Figure S4.** Main interaction pathways for biomass pyrolysis of tar GDO using 1wt% Ce/ H $\beta$  zeolite as the catalyst at 400°C and process time of 3h (Decarbonylation and decarboxylation steps are not shown).

42  
43  
44  
45
